# Supplementary material
Source: PubMed Central journal article supplement (PMC11477834)
Supplement: ajcr0014-4551-f8.pdf [file ajcr0014-4551-f8.pdf]

# IDO1 facilitates senescence escape and chemoresistance of colon cancer

**Table S1.** The primers used in this study

| Gene      | Primer | Sequences               |
|-----------|--------|-------------------------|
| BMI1      | F      | GACTCTGGGAGTGACAAGGC    |
|           | R      | AGATTGGTGGTTACCGCTGG    |
| EST2      | F      | GGGTCGGCTCAATTCAGGG     |
|           | R      | GCCAAACCTGCCTTTGGAAT    |
| IGFBP3    | F      | CGCCAGCTCCAGGTGAG       |
|           | R      | GGGGTGGAACTTGGGATCAG    |
| IGFBP5    | F      | AACGAAAAGAGCTACCGCGA    |
|           | R      | CCGACAACTTGGACTGGGT     |
| IGFBP7    | F      | TGGGTGCTGGTATCTCCTCT    |
|           | R      | TAGCTCGGCACCTTCACCTT    |
| MAP2K1    | F      | CTCTGCAGTTAACGGGACCA    |
|           | R      | CTCCACCTTCTGCTTCTGG     |
| MAP2K3    | F      | TGCCCCAGTCCAAGGAAAAT    |
|           | R      | GTGCGCATGTTGATGTCCAG    |
| MAPK14    | F      | CAGCTTCAGCAGATTATGCGT   |
|           | R      | GATCGGCCACTGGTTCATCA    |
| SERPINB2  | F      | AATGAGGAGGGCACTGAAGC    |
|           | R      | AGGGTGAGGAAAATCTGCCG    |
| SOD1      | F      | ACAAAGATGGTGTGGCCGAT    |
|           | R      | AACGACTTCAGCGTTTCCT     |
| TBX2      | F      | ACCAGTTCACAAGCTAGGC     |
|           | R      | GGATGTACATGCGTTTGGGC    |
| IDO1      | F      | CCAGCTATCAGACGGTCTG     |
|           | R      | CGGACTGAGGGATTTGACTC    |
| p16       | F      | CTTCTGGACACGCTGGTG      |
|           | R      | AATCGGGGATGTCTGAGGGA    |
| p21       | F      | CGTCAAATCCTCCCTTCCTG    |
|           | R      | CTTTGAGGTGCGTGTGTTGTGCC |
| p53       | F      | CTTTGAGGTGCGTGTGTTGTGCC |
|           | R      | GGTTTCTTCTTTGGCTGGGGA   |
| cyclin D1 | F      | CTGATTGGACAGGCATGGGT    |
|           | R      | GTGCCTGGAAGTCAACGGTA    |
| GAPDH     | F      | AAGGTCGGAGTCAACGGATT    |
|           | R      | CCTGGAAGATGGTGATGGGATT  |
| siIGFBP5  | F      | AGAAAGCAGUGCAAACCUUtt   |
|           | R      | AAGGUUUGCACUGCUUUUCt    |
